# Supplementary material for: Human skeletal muscle tissue chip autonomous payload reveals changes in fiber type and metabolic gene expression due to spaceflight
Source: PubMed Central journal article supplement (PMC10504373; doi:10.1038/s41526-023-00322-y), 2023-09-15
Supplement: 41526_2023_322_MOESM1_ESM.pdf [file 41526_2023_322_MOESM1_ESM.pdf]

## Supplementary Material

### Human Skeletal Muscle Tissue Chip Autonomous Payload Reveals Changes in Fiber Type and Metabolic Gene Expression Due to Spaceflight

Maddalena Parafati<sup>1\*</sup>, Shelby Giza<sup>1\*</sup>, Tushar S. Shenoy<sup>1</sup>, Jorge A. Mojica-Santiago<sup>2</sup>, Meghan Hopf<sup>3</sup>, Legrand K. Malany<sup>4</sup>, Don Platt<sup>5</sup>, Isabel Moore<sup>6</sup>, Zachary A. Jacobs<sup>6</sup>, Paul Kuehl<sup>6</sup>, Jason Rexroat<sup>6</sup>, Gentry Barnett<sup>6</sup>, Christine E. Schmidt<sup>2</sup>, William T. McLamb<sup>6</sup>, Twyman Clements<sup>6</sup>, Paul M. Coen<sup>3</sup> and Siobhan Malany<sup>1</sup>.

<sup>1</sup>Department of Pharmacodynamics, College of Pharmacy, University of Florida, Florida 32610, USA.

<sup>2</sup>J. Crayton Pruitt Family Department of Biomedical Engineering, Herbert Wertheim College of Engineering, University of Florida, Gainesville, Florida 32610, USA

<sup>3</sup>Translational Research Institute, AdventHealth, Orlando, Florida 32804, USA

<sup>4</sup>Micro-gRx, INC, Orlando, Florida 32935, USA

<sup>5</sup>Micro Aerospace Solutions, INC, Melbourne, Florida 32935, USA

<sup>6</sup>Space Tango, LLC, Lexington, Kentucky 40505, USA

\*Authors contributed equally

This document contains Supplementary Tables 1 through 7 and Figures 1 and 2.

**Supplementary Table 1A and B.** RNA quantification and RNA Integrity Number (RIN) for (A) flight samples and (B) Ground samples (p. S2)

**Supplementary Table 2.** Differentially expressed genes in Flight versus Ground young, athletic derived myobundles (pp. S3-7)

**Supplementary Table 3.** Differentially expressed genes in Flight versus Ground old, sedentary derived myobundles (pp. S8-15)

**Supplementary Table 4.** Gene Ontology enrichment analysis in Flight versus Ground young, athletic derived myobundles (p. S16)

**Supplementary Table 5.** Gene Ontology enrichment analysis in Flight versus Ground old, sedentary derived myobundles (pp. S17-18)

**Supplementary Table 6.** Differentially expressed genes in old, sedentary vs young, athletic derived myobundles in Ground culturing condition (pp. 19-21)

**Supplementary Table 7.** Differentially expressed genes in old, sedentary vs young, athletic derived myobundles in Flight culturing condition (pp. 22-24)

**Supplementary Figure 1.** Panther classification system analysis (p.25)

**Supplementary Figure 2.** Gene ontology (GO) annotation (p. 26)

**Supplementary Figure 3.** Unique and common DEGs comparing ground OS vs YA and flight OS vs YA datasets (pp. 27-28).

**Supplementary Table 1. RNA quantification and RNA Integrity Number (RIN) for (A) flight samples and (B) Ground samples.**

**A. RNA quantity for Flight samples**

| Chip # | Description    | RNA (ng) | RIN  |
|--------|----------------|----------|------|
| 1      | Old Estim      | 1637.7   | 8.7  |
| 2      | Old Estim      | 1216.7   | 7.1  |
| 3      | Old Estim      | 1139.3   | 7.2  |
| 4      | Young Estim    | 1497.8   | 7.2  |
| 5      | Young Estim    | 1434.4   | 6.8  |
| 6      | Young Estim    | 1725.7   | 9.6  |
| 7      | Young No Estim | 1312.2   | 7.2  |
| 8      | Young Estim    | 1821.8   | 9.1  |
| 9      | Old No Estim   | 1753.2   | 6.9  |
| 10     | Old No Estim   | 2225.6   | 7.0* |
| 11     | Old No Estim   | 1007.8   | 7.1* |
| 12     | Old No Estim   | 3505.4   | 9.0* |
| 13     | Young No Estim | 1878.7   | 8.9* |
| 14     | Young No Estim | 884.1    | 6.2  |
| 15     | Young No Estim | 1710     | 7.2* |
| 16     | Young No Estim | 1188.6   | 9.0* |

**B. RNA quantity for Ground samples**

| Chip # | Description    | RNA (ng) | RIN  |
|--------|----------------|----------|------|
| 1      | Old No Estim   | 1395     | 9.3* |
| 2      | Old No Estim   | 1014     | 9.3* |
| 3      | Old No Estim   | 1234     | 9.2* |
| 4      | Old No Estim   | 1650     | 9.5  |
| 5      | Young No Estim | 1500     | 9.1* |
| 6      | Young No Estim | 990      | 9.1* |
| 7      | Young No Estim | 1456     | 9.3* |
| 8      | Young No Estim | 1284     | 9.0  |

\*Tissue chips used in the analysis and reported in the communication. Each chip is derived from cells pooled from 5 male donors of the YA cohort or the OS cohort. Estim and No Estim indicates tissue chips that were stimulated over the time course of the experiment vs tissue chips that were not electrically stimulated, respectively.

**Supplementary Table 2. Differentially expressed genes in Flight versus Ground young, athletic derived myobundles**

| Gene                          | Description                                                   | Fold Change | FDR         |
|-------------------------------|---------------------------------------------------------------|-------------|-------------|
| <b>Upregulated Genes (44)</b> |                                                               |             |             |
| <i>AC093525.2</i>             | AC093525.2 readthrough                                        | 7.164650421 | 5.21275E-05 |
| <i>CNTNAP2</i>                | contactin associated protein 2                                | 5.450281716 | 0.000617734 |
| <i>GRIA4</i>                  | glutamate ionotropic receptor AMPA type subunit 4             | 5.366105495 | 4.16413E-05 |
| <i>CSF3R</i>                  | colony stimulating factor 3 receptor                          | 5.048318314 | 0.040861248 |
| <i>OR51E2</i>                 | olfactory receptor family 51 subfamily E member 2             | 4.982648803 | 0.000195307 |
| <i>DYDC2</i>                  | DPY30 domain containing 2                                     | 4.868519969 | 0.032258577 |
| <i>CPB1</i>                   | carboxypeptidase B1                                           | 4.157978745 | 0.025455092 |
| <i>METTL21C</i>               | methyltransferase 21C, AARS1 lysine                           | 3.814856526 | 0.0009246   |
| <i>MCHR1</i>                  | melanin concentrating hormone receptor 1                      | 3.135941902 | 2.71353E-07 |
| <i>UMODL1</i>                 | uromodulin like 1                                             | 2.992139178 | 0.024107585 |
| <i>AC018630.2</i>             | AC018630.2 readthrough                                        | 2.838326714 | 0.031842359 |
| <i>ABCG4</i>                  | ATP binding cassette subfamily G member 4                     | 2.768271531 | 0.024622362 |
| <i>KCNJ4</i>                  | potassium inwardly rectifying channel subfamily J member 4    | 2.597140863 | 0.000184233 |
| <i>MYRFL</i>                  | myelin regulatory factor like                                 | 2.574460737 | 1.93839E-06 |
| <i>VWDE</i>                   | von Willebrand factor D and EGF domains                       | 2.547118719 | 0.005281277 |
| <i>PFKP</i>                   | phosphofructokinase, platelet                                 | 2.544060278 | 4.67614E-06 |
| <i>HS6ST3</i>                 | heparan sulfate 6-O-sulfotransferase 3                        | 2.511162382 | 0.023621889 |
| <i>COL6A6</i>                 | collagen type VI alpha 6 chain                                | 2.458016866 | 0.004006578 |
| <i>TGFBR3L</i>                | transforming growth factor beta receptor 3 like               | 2.42910639  | 0.024866346 |
| <i>MDF1</i>                   | MyoD family inhibitor                                         | 2.38453661  | 0.043843058 |
| <i>SERPINA5</i>               | serpin family A member 5                                      | 2.369500506 | 0.003012647 |
| <i>PODNL1</i>                 | podocan like 1                                                | 2.324977308 | 3.5276E-14  |
| <i>FGF12</i>                  | fibroblast growth factor 12                                   | 2.295016809 | 0.017954825 |
| <i>SLC6A1</i>                 | solute carrier family 6 member 1                              | 2.287422637 | 0.007291892 |
| <i>MGP</i>                    | matrix Gla protein                                            | 2.272479259 | 0.001483125 |
| <i>SCIN</i>                   | scinderin                                                     | 2.260979666 | 0.001273009 |
| <i>ZNF850</i>                 | zinc finger protein 850                                       | 2.251668785 | 0.002335027 |
| <i>SLCO4A1</i>                | solute carrier organic anion transporter family member        | 2.249036509 | 1.16401E-07 |
| <i>B3GNT4</i>                 | UDP-GlcNAc:betaGal beta-1,3-N-acetylglucosaminyltransferase 4 | 2.244322193 | 0.028133397 |

|                 |                                                            |              |             |
|-----------------|------------------------------------------------------------|--------------|-------------|
| <i>GRM1</i>     | glutamate metabotropic receptor 1                          | 2.231068317  | 3.6986E-05  |
| <i>TTC34</i>    | tetratricopeptide repeat domain 34                         | 2.186841093  | 0.016333667 |
| <i>FAM178B</i>  | FAM178B: family with sequence similarity 178 member B      | 2.183341716  | 0.001413665 |
| <i>FAM57B</i>   | FAM57B: family with sequence similarity 57 member B        | 2.156290814  | 7.54584E-15 |
| <i>PALM3</i>    | paralemmin 3                                               | 2.140786839  | 0.032658474 |
| <i>TOR4A</i>    | torsin family 4 member A                                   | 2.127319267  | 1.89407E-10 |
| <i>YPELA</i>    | yipee like 4                                               | 2.121103069  | 0.028785587 |
| <i>CTRL</i>     | chymotrypsin like                                          | 2.113328046  | 0.01915699  |
| <i>PLB1</i>     | phospholipase B1                                           | 2.113285066  | 0.023783155 |
| <i>CHAC1</i>    | ChaC glutathione specific gamma-glutamylcyclotransferase 1 | 2.113091053  | 0.001268902 |
| <i>DCDC1</i>    | doublecortin domain containing 1                           | 2.101303893  | 0.029020203 |
| <i>PNLIPRP3</i> | pancreatic lipase related protein 3                        | 2.070574498  | 0.021410201 |
| <i>C7</i>       | complement C7                                              | 2.067699643  | 7.46116E-07 |
| <i>SUSD4</i>    | sushi domain containing 4                                  | 2.036046359  | 1.60688E-17 |
| <i>VIL1</i>     | villin 1                                                   | 2.00816373   | 0.04739108  |
|                 | <b>Downregulated Genes (110)</b>                           |              |             |
| <i>GUCY1A2</i>  | guanylate cyclase 1 soluble subunit alpha 2                | -2.018093048 | 1.99411E-10 |
| <i>ZFP36</i>    | ZFP36 ring finger protein                                  | -2.018876449 | 3.01373E-06 |
| <i>EFEMP1</i>   | EGF containing fibulin extracellular matrix protein 1      | -2.027015633 | 0.000259005 |
| <i>RIMS3</i>    | regulating synaptic membrane exocytosis 3                  | -2.033630867 | 0.005667261 |
| <i>PCDHA7</i>   | protocadherin alpha 7                                      | -2.034751645 | 0.028353136 |
| <i>PDE11A</i>   | phosphodiesterase 11A                                      | -2.043430345 | 0.037300533 |
| <i>TMEM178B</i> | transmembrane protein 178B                                 | -2.043941926 | 5.64787E-36 |
| <i>EGR2</i>     | early growth response 2                                    | -2.049376215 | 6.8619E-05  |
| <i>SPAAR</i>    | small regulatory polypeptide of amino acid response        | -2.057438265 | 0.026079467 |
| <i>BIRC3</i>    | baculoviral IAP repeat containing 3                        | -2.065881453 | 8.43477E-06 |
| <i>NGFR</i>     | nerve growth factor receptor                               | -2.071120425 | 6.1174E-05  |
| <i>PHACTR3</i>  | phosphatase and actin regulator 3                          | -2.076778696 | 0.000204077 |
| <i>OAS3</i>     | 2'-5'-oligoadenylate synthetase 3                          | -2.087824987 | 0.000469052 |
| <i>CXCL8</i>    | C-X-C motif chemokine ligand 8                             | -2.125016841 | 0.016734854 |
| <i>SHISA9</i>   | shisa family member 9                                      | -2.126294751 | 4.22057E-09 |
| <i>JUNB</i>     | JunB proto-oncogene, AP-1 transcription factor subunit     | -2.127731456 | 0.000641766 |
| <i>ITGB3</i>    | integrin subunit beta 3                                    | -2.131777766 | 6.56226E-08 |
| <i>FAM43B</i>   | family with sequence similarity 43 member B                | -2.13361598  | 0.033720356 |
| <i>CDHR1</i>    | cadherin related family member 1                           | -2.134569371 | 6.77655E-05 |

|                    |                                                       |              |             |
|--------------------|-------------------------------------------------------|--------------|-------------|
| <i>ALS2CR12</i>    | ALS2CR12 readthrough                                  | -2.142778176 | 0.00123712  |
| <i>C11orf96</i>    | chromosome 11 open reading frame 96                   | -2.148358618 | 0.000238374 |
| <i>CLIC2</i>       | chloride intracellular channel 2                      | -2.156646387 | 0.036441058 |
| <i>PCDH10</i>      | protocadherin 10                                      | -2.162674866 | 0.00519119  |
| <i>PTX3</i>        | pentraxin 3                                           | -2.169064812 | 3.50516E-05 |
| <i>RCCD1</i>       | RCC1 domain containing 1                              | -2.200601598 | 0.028435238 |
| <i>AC073896.1</i>  | AC073896.1 readthrough                                | -2.200991483 | 0.000140442 |
| <i>GCNT1</i>       | glucosaminyl (N-acetyl) transferase 1                 | -2.243308128 | 0.027705945 |
| <i>GIPC2</i>       | GIPC PDZ domain containing family member 2            | -2.269410671 | 0.012464612 |
| <i>TLE2</i>        | TLE family member 2, transcriptional corepressor      | -2.269757409 | 0.015884135 |
| <i>OTUD1</i>       | OTU deubiquitinase 1                                  | -2.287705143 | 6.79091E-15 |
| <i>MYH6</i>        | myosin heavy chain 6                                  | -2.290182333 | 8.65344E-07 |
| <i>SBK2</i>        | SH3 domain binding kinase family member 2             | -2.294608569 | 0.013172591 |
| <i>CORO2A</i>      | coronin 2A                                            | -2.300680372 | 0.024373908 |
| <i>RANBP17</i>     | RAN binding protein 17                                | -2.314937945 | 0.040476689 |
| <i>GNRHR</i>       | gonadotropin releasing hormone receptor               | -2.325688078 | 0.00815339  |
| <i>C8orf34</i>     | chromosome 8 open reading frame 34                    | -2.33723793  | 0.028258487 |
| <i>KCNA10</i>      | potassium voltage-gated channel subfamily A member 10 | -2.343994096 | 0.02806624  |
| <i>IGSF3</i>       | immunoglobulin superfamily member 3                   | -2.355276695 | 5.4917E-05  |
| <i>MINOS1-NBL1</i> | MICOS10-NBL1 readthrough                              | -2.389441362 | 0.000278839 |
| <i>CSF3</i>        | colony stimulating factor 3                           | -2.438831523 | 5.61648E-05 |
| <i>CA7</i>         | carbonic anhydrase 7                                  | -2.446927221 | 7.81941E-06 |
| <i>ADGRD1</i>      | adhesion G protein-coupled receptor D1                | -2.450835201 | 8.09285E-12 |
| <i>ITIH3</i>       | inter-alpha-trypsin inhibitor heavy chain 3           | -2.457215484 | 0.022896877 |
| <i>CTXN3</i>       | cortixin 3                                            | -2.459783114 | 3.56648E-14 |
| <i>EGR1</i>        | early growth response 1                               | -2.485448008 | 0.000102019 |
| <i>SLC29A4</i>     | solute carrier family 29 member 4                     | -2.501427569 | 2.20492E-10 |
| <i>ABCA4</i>       | ATP binding cassette subfamily A member 4             | -2.503758261 | 0.000635994 |
| <i>TMEM40</i>      | transmembrane protein 40                              | -2.551979434 | 0.004537744 |
| <i>CDYL2</i>       | chromodomain Y like 2                                 | -2.554687625 | 2.66455E-18 |
| <i>MGAT4C</i>      | MGAT4 family member C                                 | -2.557487954 | 0.033624859 |
| <i>CD24</i>        | CD24 molecule                                         | -2.590494325 | 5.89464E-06 |
| <i>GABRB3</i>      | gamma-aminobutyric acid type A receptor subunit beta3 | -2.60096351  | 0.000777337 |
| <i>ADAMTSL4</i>    | ADAMTS like 4                                         | -2.621886446 | 4.6055E-26  |
| <i>DNAH2</i>       | dynein axonemal heavy chain 2                         | -2.625782585 | 0.000620396 |

|                       |                                                            |              |             |
|-----------------------|------------------------------------------------------------|--------------|-------------|
| <i>SCN3A</i>          | sodium voltage-gated channel alpha subunit 3               | -2.634804574 | 0.000207852 |
| <i>CNTN3</i>          | contactin 3                                                | -2.66779935  | 4.33268E-05 |
| <i>MAS1</i>           | MAS1 proto-oncogene, G protein-coupled receptor            | -2.694376738 | 8.96184E-09 |
| <i>PRDM6</i>          | PR/SET domain 6                                            | -2.700197512 | 0.010559536 |
| <i>OR7A5</i>          | olfactory receptor family 7 subfamily A member 5           | -2.70300847  | 0.008383645 |
| <i>MTUS2</i>          | microtubule associated scaffold protein 2                  | -2.706234786 | 1.02358E-05 |
| <i>SLCO2B1</i>        | solute carrier organic anion transporter family member 2B1 | -2.71005521  | 0.019104909 |
| <i>CUX2</i>           | cut like homeobox 2                                        | -2.715096495 | 0.012893493 |
| <i>SCN7A</i>          | sodium voltage-gated channel alpha subunit 7               | -2.72408044  | 0.013424219 |
| <i>CXCL5</i>          | C-X-C motif chemokine ligand 5                             | -2.779740703 | 0.017285992 |
| <i>VMO1</i>           | vitelline membrane outer layer 1 homolog                   | -2.798735883 | 0.016978677 |
| <i>SOCS1</i>          | suppressor of cytokine signaling 1                         | -2.811750603 | 0.004700644 |
| <i>MMP9</i>           | matrix metalloproteinase 9                                 | -2.826698247 | 0.045205873 |
| <i>FAM19A2</i>        | FAM19A2 readthrough                                        | -2.838004149 | 0.014019371 |
| <i>CACNA1E</i>        | calcium voltage-gated channel subunit alpha 1 E            | -2.858147793 | 0.005064968 |
| <i>ONECUT2</i>        | one cut homeobox 2                                         | -2.915792192 | 0.00048654  |
| <i>INSC</i>           | INSC spindle orientation adaptor protein                   | -2.916515798 | 0.014456608 |
| <i>DGAT2</i>          | diacylglycerol O-acyltransferase 2                         | -2.919201125 | 0.045426703 |
| <i>DMBT1</i>          | deleted in malignant brain tumors 1                        | -2.94457787  | 2.44486E-05 |
| <i>FOS</i>            | Fos proto-oncogene, AP-1 transcription factor subunit      | -2.991999455 | 0.000247171 |
| <i>CXCL13</i>         | C-X-C motif chemokine ligand 13                            | -3.067756845 | 3.47741E-16 |
| <i>ADRB2</i>          | adrenoceptor beta 2                                        | -3.096994028 | 7.76539E-19 |
| <i>SERPINB7</i>       | serpin family B member 7                                   | -3.187850298 | 0.00519119  |
| <i>FLRT1</i>          | fibronectin leucine rich transmembrane protein 1           | -3.270832353 | 0.019496782 |
| <i>PTPRC</i>          | protein tyrosine phosphatase receptor type C               | -3.287150062 | 0.006176527 |
| <i>RELN</i>           | reelin                                                     | -3.319118652 | 0.000292176 |
| <i>PK4</i>            | pyruvate dehydrogenase kinase 4                            | -3.325146285 | 3.85134E-05 |
| <i>FOSB</i>           | FosB proto-oncogene, AP-1 transcription factor subunit     | -3.375890553 | 7.71904E-07 |
| <i>ANO2</i>           | anoctamin 2                                                | -3.446938388 | 0.003711354 |
| <i>ESM1</i>           | endothelial cell specific molecule 1                       | -3.500513259 | 0.007727148 |
| <i>KISS1</i>          | KiSS-1 metastasis suppressor                               | -3.600023239 | 0.0001874   |
| <i>SSTR2</i>          | somatostatin receptor 2                                    | -3.619293532 | 0.009280342 |
| <i>TMEM110-MUSTN1</i> | TMEM110-MUSTN1 readthrough                                 | -3.648751254 | 7.35509E-05 |
| <i>SMTNL1</i>         | smoothelin like 1                                          | -3.6934315   | 1.00875E-06 |
| <i>MYL10</i>          | myosin light chain 10                                      | -3.95865901  | 9.39304E-08 |

|                   |                                                      |              |             |
|-------------------|------------------------------------------------------|--------------|-------------|
| <i>PDZD2</i>      | PDZ domain containing 2                              | -3.98994048  | 0.00136236  |
| <i>SCARA5</i>     | scavenger receptor class A member 5                  | -4.009235804 | 7.62091E-21 |
| <i>PVALB</i>      | parvalbumin                                          | -4.0198962   | 0.000257454 |
| <i>SYT1</i>       | synaptotagmin 1                                      | -4.034078439 | 0.000140442 |
| <i>PSG11</i>      | pregnancy specific beta-1-glycoprotein 11            | -4.113972439 | 0.012018776 |
| <i>CUZD1</i>      | CUB and zona pellucida like domains 1                | -4.116254828 | 1.61224E-05 |
| <i>DIRAS2</i>     | DIRAS family GTPase 2                                | -4.118507424 | 0.007374237 |
| <i>TM4SF20</i>    | transmembrane 4 L six family member 20               | -4.166515956 | 0.000391648 |
| <i>DEFB103B</i>   | defensin beta 103B                                   | -4.214503417 | 0.000139906 |
| <i>KCNA2</i>      | potassium voltage-gated channel subfamily A member 2 | -4.217102228 | 0.006392639 |
| <i>AC013489.1</i> | AC013489.1 readthrough                               | -4.29376469  | 0.032170351 |
| <i>STEAP4</i>     | STEAP4 metalloreductase                              | -4.403227272 | 0.002524526 |
| <i>RPTN</i>       | repetin                                              | -4.470907609 | 8.15675E-06 |
| <i>KPRP</i>       | keratinocyte proline rich protein                    | -4.526968504 | 0.000157524 |
| <i>LY75-CD302</i> | LY75-CD302 readthrough                               | -4.591585426 | 0.027003205 |
| <i>CXCL6</i>      | C-X-C motif chemokine ligand 6                       | -4.602979064 | 0.006890469 |
| <i>CISH</i>       | cytokine inducible SH2 containing protein            | -4.645653524 | 0.001169639 |
| <i>GCNT3</i>      | glucosaminyl (N-acetyl) transferase 3, mucin type    | -4.665883943 | 3.33171E-15 |
| <i>SERPINB2</i>   | serpin family B member 2                             | -5.469421134 | 0.001240009 |
| <i>SULT1A4</i>    | sulfotransferase family 1A member 4                  | -5.943844153 | 0.007648353 |
| <i>PSG1</i>       | pregnancy specific beta-1-glycoprotein 1             | -6.233947331 | 0.001443649 |

**Supplementary Table 3. Differentially expressed genes in Flight versus Ground old, sedentary derived myobundles**

| <i>Gene</i>       | Description                                                | Fold Change | FDR         |
|-------------------|------------------------------------------------------------|-------------|-------------|
|                   | <b>Upregulated Genes (99)</b>                              |             |             |
| <i>HIST2H2AA3</i> | HIST2H2AA3 readthrough                                     | 9.996972635 | 0.014365614 |
| <i>AC048338.1</i> | AC048338.1 readthrough                                     | 9.896124868 | 6.53643E-06 |
| <i>CSF3R</i>      | colony stimulating factor 3 receptor                       | 7.336449293 | 0.000980146 |
| <i>HBA2</i>       | hemoglobin subunit alpha 2                                 | 6.629040764 | 0.005256727 |
| <i>AP000350.4</i> | AP000350.4 readthrough                                     | 6.200975095 | 0.008942407 |
| <i>SLC14A1</i>    | solute carrier family 14 member 1 (Kidd blood group)       | 5.833977572 | 0.001174276 |
| <i>KRT19</i>      | keratin 19                                                 | 5.284363775 | 0.00127304  |
| <i>RSAD2</i>      | radical S-adenosyl methionine domain containing 2          | 5.057491019 | 0.000376949 |
| <i>GAL3ST1</i>    | galactose-3-O-sulfotransferase 1                           | 4.440323571 | 0.000592674 |
| <i>CPB1</i>       | carboxypeptidase B1                                        | 4.384920788 | 0.000258081 |
| <i>FSCN3</i>      | fascin actin-bundling protein 3                            | 4.193087119 | 0.000633467 |
| <i>KRT8</i>       | keratin 8                                                  | 4.151324259 | 0.015616573 |
| <i>ENO4</i>       | enolase 4                                                  | 4.085678152 | 0.008847841 |
| <i>METTL21C</i>   | methyltransferase 21C, AARS1 lysine                        | 3.965837441 | 0.000487923 |
| <i>ARHGAP36</i>   | Rho GTPase activating protein 36                           | 3.916108217 | 0.030072269 |
| <i>RORC</i>       | RAR related orphan receptor C                              | 3.893111603 | 4.48508E-38 |
| <i>KCNJ3</i>      | potassium inwardly rectifying channel subfamily J member 3 | 3.784502622 | 0.00083577  |
| <i>ST20-MTHFS</i> | ST20-MTHFS readthrough                                     | 3.762067682 | 0.001953065 |
| <i>NOS1</i>       | nitric oxide synthase 1                                    | 3.703729233 | 3.58378E-15 |
| <i>FAM57B</i>     | FAM57B readthrough                                         | 3.703378318 | 9.72522E-45 |
| <i>SERPINA5</i>   | serpin family A member 5                                   | 3.679110525 | 2.27285E-07 |
| <i>LCPI</i>       | lymphocyte cytosolic protein 1                             | 3.671761138 | 0.011029286 |
| <i>CNTNAP2</i>    | contactin associated protein 2                             | 3.538737469 | 0.003434529 |
| <i>OR51E2</i>     | olfactory receptor family 51 subfamily E member 2          | 3.44537276  | 0.000345925 |
| <i>IRF4</i>       | interferon regulatory factor 4                             | 3.417250424 | 0.013594084 |
| <i>HSD11B2</i>    | hydroxysteroid 11-beta dehydrogenase 2                     | 3.26539635  | 5.30574E-09 |
| <i>FAM83E</i>     | family with sequence similarity 83 member E                | 3.187961906 | 0.044733397 |
| <i>MTCPI</i>      | mature T cell proliferation 1                              | 3.178835087 | 0.014035233 |
| <i>LYZ</i>        | lysozyme                                                   | 3.149502048 | 0.002253136 |
| <i>SLCO4A1</i>    | solute carrier organic anion transporter family member 4A1 | 3.132334346 | 2.38179E-14 |
| <i>MYRFL</i>      | myelin regulatory factor like                              | 3.081932779 | 6.03269E-09 |



|                 |                                                                  |             |             |
|-----------------|------------------------------------------------------------------|-------------|-------------|
| <i>CH25H</i>    | cholesterol 25-hydroxylase                                       | 3.07467968  | 0.006172311 |
| <i>ADAM8</i>    | ADAM metallopeptidase domain 8                                   | 3.026603305 | 0.001069424 |
| <i>CSKMT</i>    | citrate synthase lysine methyltransferase                        | 2.984105134 | 1.48198E-08 |
| <i>KIAA0040</i> | KIAA0040 readthrough                                             | 2.897171856 | 0.000153288 |
| <i>RAB33A</i>   | RAB33A, member RAS oncogene family                               | 2.880591264 | 0.020934461 |
| <i>CORO1A</i>   | coronin 1A                                                       | 2.879991295 | 0.039013179 |
| <i>SLC37A2</i>  | solute carrier family 37 member 2                                | 2.876235031 | 0.031833815 |
| <i>TRIB3</i>    | tribbles pseudokinase 3                                          | 2.872474462 | 8.90624E-18 |
| <i>LLGL2</i>    | LLGL scribble cell polarity complex component 2                  | 2.844440683 | 1.44856E-09 |
| <i>SLC6A9</i>   | solute carrier family 6 member 9                                 | 2.820442933 | 2.7412E-05  |
| <i>C2CD4A</i>   | C2 calcium dependent domain containing 4A                        | 2.802341488 | 1.80206E-08 |
| <i>CHAD</i>     | chondroadherin                                                   | 2.793136991 | 0.002692199 |
| <i>CHAC1</i>    | ChaC glutathione specific gamma-glutamylcyclotransferase 1       | 2.791954301 | 1.58653E-06 |
| <i>LINGO4</i>   | leucine rich repeat and Ig domain containing 4                   | 2.77428638  | 0.02268445  |
| <i>NPBWR1</i>   | neuropeptides B and W receptor 1                                 | 2.770595739 | 0.000171063 |
| <i>SCUBE2</i>   | signal peptide, CUB domain and EGF like domain containing 2      | 2.725747424 | 1.63132E-21 |
| <i>C4orf17</i>  | chromosome 4 open reading frame 17                               | 2.715711659 | 0.030599871 |
| <i>PCK2</i>     | phosphoenolpyruvate carboxykinase 2, mitochondrial               | 2.688584044 | 2.39918E-19 |
| <i>MX1</i>      | MX dynamin like GTPase 1                                         | 2.627265865 | 0.000312272 |
| <i>SLC9A3</i>   | solute carrier family 9 member A3                                | 2.624480958 | 0.00451659  |
| <i>ABCB4</i>    | ATP binding cassette subfamily B member 4                        | 2.613250985 | 0.022695037 |
| <i>CA14</i>     | carbonic anhydrase 14                                            | 2.600229786 | 0.00088289  |
| <i>PCLAF</i>    | PCNA clamp associated factor                                     | 2.600007731 | 0.013165177 |
| <i>PHGDH</i>    | phosphoglycerate dehydrogenase                                   | 2.597687813 | 9.60059E-16 |
| <i>PLCB2</i>    | phospholipase C beta 2                                           | 2.587428562 | 5.05261E-05 |
| <i>KRT18</i>    | keratin 18                                                       | 2.556450727 | 1.31829E-05 |
| <i>ADRA2A</i>   | adrenoceptor alpha 2A                                            | 2.554008547 | 7.19851E-13 |
| <i>SLC6A1</i>   | solute carrier family 6 member 1                                 | 2.545584324 | 0.001193861 |
| <i>GCOM1</i>    | GCOM1, MYZAP-POLR2M combined locus                               | 2.543365656 | 0.009504753 |
| <i>APLN</i>     | apelin                                                           | 2.485238218 | 0.003614168 |
| <i>MMP9</i>     | matrix metallopeptidase 9                                        | 2.480190644 | 0.041806699 |
| <i>GRM1</i>     | glutamate metabotropic receptor 1                                | 2.451745383 | 5.76266E-07 |
| <i>ELN</i>      | elastin                                                          | 2.442668494 | 1.42308E-18 |
| <i>TRPM8</i>    | transient receptor potential cation channel subfamily M member 8 | 2.43841871  | 1.609E-05   |
| <i>KCNRG</i>    | potassium channel regulator                                      | 2.424743962 | 0.005477797 |

|                                  |                                                               |             |             |
|----------------------------------|---------------------------------------------------------------|-------------|-------------|
| <i>PLIN4</i>                     | perilipin 4                                                   | 2.418158315 | 2.50827E-15 |
| <i>ABCG1</i>                     | ATP binding cassette subfamily G member 1                     | 2.409928463 | 9.60356E-26 |
| <i>ASB10</i>                     | ankyrin repeat and SOCS box containing 10                     | 2.409437385 | 2.6281E-06  |
| <i>PERM1</i>                     | PPARGC1 and ESRR induced regulator, muscle 1                  | 2.393578989 | 3.37929E-09 |
| <i>GLDN</i>                      | gliomedin                                                     | 2.390485559 | 4.17275E-05 |
| <i>BRICD5</i>                    | BRICHOS domain containing 5                                   | 2.37946023  | 0.017334931 |
| <i>OAS1</i>                      | 2'-5'-oligoadenylate synthetase 1                             | 2.358644057 | 0.017324701 |
| <i>NDRG4</i>                     | NDRG family member 4                                          | 2.348510796 | 2.53496E-12 |
| <i>IFITM1</i>                    | interferon induced transmembrane protein 1                    | 2.341173199 | 0.000385455 |
| <i>TFCP2L1</i>                   | transcription factor CP2 like 1                               | 2.330740277 | 0.043211995 |
| <i>FHAD1</i>                     | forkhead associated phosphopeptide binding domain 1           | 2.310468721 | 0.003984946 |
| <i>NOXO1</i>                     | NADPH oxidase organizer 1                                     | 2.303047422 | 0.000168865 |
| <i>FAM178B</i>                   | family with sequence similarity 178 member B                  | 2.296591338 | 0.000829266 |
| <i>THRSP</i>                     | thyroid hormone responsive                                    | 2.291401212 | 0.004577044 |
| <i>MCHR1</i>                     | melanin concentrating hormone receptor 1                      | 2.280855022 | 0.00021079  |
| <i>EXOC3L1</i>                   | exocyst complex component 3 like 1                            | 2.237784772 | 1.18055E-05 |
| <i>POU2F2</i>                    | POU class 2 homeobox 2                                        | 2.225137741 | 0.038942049 |
| <i>NRN1L</i>                     | neuritin 1 like                                               | 2.208437259 | 0.000551956 |
| <i>ARG2</i>                      | arginase 2                                                    | 2.181974414 | 6.02253E-07 |
| <i>HSPA2</i>                     | heat shock protein family A (Hsp70) member 2                  | 2.181613481 | 0.001367034 |
| <i>VIL1</i>                      | villin 1                                                      | 2.154467686 | 0.027073905 |
| <i>RTN4RL2</i>                   | reticulon 4 receptor like 2                                   | 2.143646973 | 6.39305E-10 |
| <i>EGFL7</i>                     | EGF like domain multiple 7                                    | 2.130354194 | 7.92453E-25 |
| <i>RASGRP2</i>                   | RAS guanyl releasing protein 2                                | 2.105147255 | 1.17602E-10 |
| <i>PFKP</i>                      | phosphofructokinase, platelet                                 | 2.079083902 | 0.000185431 |
| <i>CD101</i>                     | CD101 molecule                                                | 2.049526837 | 3.26453E-05 |
| <i>FAM129A</i>                   | FAM129A readthrough                                           | 2.037754959 | 1.02031E-21 |
| <i>KCNS3</i>                     | potassium voltage-gated channel modifier subfamily S member 3 | 2.026461785 | 5.67255E-14 |
| <i>TOR4A</i>                     | torsin family 4 member A                                      | 2.02357543  | 5.99937E-11 |
| <i>CCDC28B</i>                   | coiled-coil domain containing 28B                             | 2.020495327 | 1.16227E-13 |
| <i>PRODH</i>                     | proline dehydrogenase 1                                       | 2.020243469 | 4.24532E-11 |
| <i>COL15A1</i>                   | collagen type XV alpha 1 chain                                | 2.014387784 | 8.45469E-18 |
| <i>ADM2</i>                      | adrenomedullin 2                                              | 2.013952235 | 0.004454598 |
| <i>CBS</i>                       | cystathionine beta-synthase                                   | 2.002847428 | 4.34413E-13 |
| <b>Downregulated Genes (153)</b> |                                                               |             |             |

|                 |                                                                     |              |             |
|-----------------|---------------------------------------------------------------------|--------------|-------------|
| <i>PAPPA</i>    | pappalysin 1                                                        | -2.001698621 | 1.68884E-05 |
| <i>MMP19</i>    | matrix metalloproteinase 19                                         | -2.004168809 | 0.00024325  |
| <i>CAPN9</i>    | calpain 9                                                           | -2.00701002  | 0.001289031 |
| <i>IDI</i>      | inhibitor of DNA binding 1                                          | -2.008436028 | 0.001189951 |
| <i>EFEMP1</i>   | EGF containing fibulin extracellular matrix protein 1               | -2.01222761  | 8.39305E-05 |
| <i>SERPINE1</i> | serpin family E member 1                                            | -2.012798599 | 0.007341419 |
| <i>MID1</i>     | midline 1                                                           | -2.014133958 | 2.71322E-08 |
| <i>ADGRV1</i>   | adhesion G protein-coupled receptor V1                              | -2.016315779 | 8.46852E-06 |
| <i>NCALD</i>    | neurocalcin delta                                                   | -2.024698413 | 3.27892E-13 |
| <i>MAPK4</i>    | mitogen-activated protein kinase 4                                  | -2.031338479 | 5.82168E-08 |
| <i>PLCXD2</i>   | phosphatidylinositol specific phospholipase C X domain containing 2 | -2.048349705 | 0.001047584 |
| <i>MINAR1</i>   | membrane integral NOTCH2 associated receptor 1                      | -2.052158468 | 1.47777E-18 |
| <i>DLK1</i>     | delta like non-canonical Notch ligand 1                             | -2.06513025  | 0.008519671 |
| <i>SSC5D</i>    | scavenger receptor cysteine rich family member with 5 domains       | -2.065761861 | 5.89858E-06 |
| <i>L3MBTL4</i>  | L3MBTL histone methyl-lysine binding protein 4                      | -2.075094071 | 0.016297521 |
| <i>EXPH5</i>    | exophilin 5                                                         | -2.088316686 | 0.001693647 |
| <i>NKD1</i>     | NKD inhibitor of WNT signaling pathway 1                            | -2.089314247 | 4.99209E-06 |
| <i>CNTN3</i>    | contactin 3                                                         | -2.101849509 | 0.001064981 |
| <i>MAP6</i>     | microtubule associated protein 6                                    | -2.105741108 | 0.000477822 |
| <i>PALM2</i>    | paralemmin 2                                                        | -2.106223896 | 1.2873E-10  |
| <i>PLGLB1</i>   | plasminogen like B1                                                 | -2.110172055 | 0.023820057 |
| <i>CPM</i>      | carboxypeptidase M                                                  | -2.118777225 | 0.018017253 |
| <i>OTUD1</i>    | OTU deubiquitinase 1                                                | -2.130851869 | 1.51378E-13 |
| <i>FAM184B</i>  | family with sequence similarity 184 member B                        | -2.132789747 | 5.04975E-07 |
| <i>CHIT1</i>    | chitinase 1                                                         | -2.143020897 | 0.000140463 |
| <i>ADRB2</i>    | adrenoceptor beta 2                                                 | -2.152287789 | 2.9653E-10  |
| <i>PAMR1</i>    | peptidase domain containing associated with muscle regeneration 1   | -2.168966168 | 5.07082E-10 |
| <i>CMTM5</i>    | CKLF like MARVEL transmembrane domain containing 5                  | -2.181187893 | 0.000343903 |
| <i>GUCY1A2</i>  | guanylate cyclase 1 soluble subunit alpha 2                         | -2.182501382 | 1.84819E-14 |
| <i>CXCL5</i>    | C-X-C motif chemokine ligand 5                                      | -2.185653502 | 0.043003003 |
| <i>PRR18</i>    | proline rich 18                                                     | -2.187533016 | 0.01263233  |
| <i>SAMD13</i>   | sterile alpha motif domain containing 13                            | -2.195411319 | 0.014011783 |
| <i>SLC6A17</i>  | solute carrier family 6 member 17                                   | -2.199972562 | 1.59345E-05 |
| <i>PPP1R1A</i>  | protein phosphatase 1 regulatory inhibitor subunit 1A               | -2.203083641 | 8.02612E-06 |
| <i>MFAP5</i>    | microfibril associated protein 5                                    | -2.20389193  | 3.08199E-05 |

|                   |                                                                  |              |             |
|-------------------|------------------------------------------------------------------|--------------|-------------|
| <i>POU5F1B</i>    | POU class 5 homeobox 1B                                          | -2.20902513  | 1.19406E-07 |
| <i>ADAMTSL4</i>   | ADAMTS like 4                                                    | -2.212038108 | 2.71408E-19 |
| <i>C19orf81</i>   | chromosome 19 open reading frame 81                              | -2.223905987 | 0.032471623 |
| <i>RNF165</i>     | ring finger protein 165                                          | -2.226441009 | 0.045548378 |
| <i>AGXT</i>       | alanine--glyoxylate aminotransferase                             | -2.227146998 | 0.011745612 |
| <i>KCNE5</i>      | potassium voltage-gated channel subfamily E regulatory subunit 5 | -2.232802059 | 1.68087E-09 |
| <i>ACTN3</i>      | actinin alpha 3                                                  | -2.236539699 | 1.94493E-05 |
| <i>LGII</i>       | leucine rich glioma inactivated 1                                | -2.244541331 | 0.00129478  |
| <i>PCDHB3</i>     | protocadherin beta 3                                             | -2.248507738 | 0.041636754 |
| <i>PPP1R27</i>    | protein phosphatase 1 regulatory subunit 27                      | -2.250189692 | 2.95039E-07 |
| <i>P2RX1</i>      | purinergic receptor P2X 1                                        | -2.256160133 | 9.65365E-06 |
| <i>TMEM217</i>    | transmembrane protein 217                                        | -2.265371971 | 0.043131825 |
| <i>C8orf34</i>    | chromosome 8 open reading frame 34                               | -2.267123331 | 0.020709145 |
| <i>SERPINB7</i>   | serpin family B member 7                                         | -2.267475774 | 0.031491506 |
| <i>SPAG6</i>      | sperm associated antigen 6                                       | -2.271276579 | 0.000294406 |
| <i>CDH8</i>       | cadherin 8                                                       | -2.275398912 | 1.76668E-07 |
| <i>MGAM</i>       | maltase-glucoamylase                                             | -2.289340221 | 0.002179971 |
| <i>AC008073.3</i> | AC008073.3 readthrough                                           | -2.29185413  | 0.023138575 |
| <i>SLC38A4</i>    | solute carrier family 38 member 4                                | -2.29421038  | 0.004517197 |
| <i>CPXM2</i>      | carboxypeptidase X, M14 family member 2                          | -2.295883371 | 0.036290694 |
| <i>CDK5R2</i>     | cyclin dependent kinase 5 regulatory subunit 2                   | -2.299826607 | 0.016450514 |
| <i>AMPH</i>       | amphiphysin                                                      | -2.306415442 | 0.000281947 |
| <i>CDHR1</i>      | cadherin related family member 1                                 | -2.307338568 | 1.08457E-05 |
| <i>CDH22</i>      | cadherin 22                                                      | -2.316198091 | 0.025658864 |
| <i>ECM2</i>       | extracellular matrix protein 2                                   | -2.319226085 | 0.000944036 |
| <i>OCA2</i>       | OCA2 melanosomal transmembrane protein                           | -2.320966428 | 0.046970969 |
| <i>MMP13</i>      | matrix metalloproteinase 13                                      | -2.322828809 | 0.001946904 |
| <i>PLEKHG7</i>    | pleckstrin homology and RhoGEF domain containing G7              | -2.328091062 | 0.019518382 |
| <i>PIP5K1B</i>    | phosphatidylinositol-4-phosphate 5-kinase type 1 beta            | -2.32866678  | 1.58839E-09 |
| <i>ITGA9</i>      | integrin subunit alpha 9                                         | -2.330332409 | 3.17321E-05 |
| <i>ILDR2</i>      | immunoglobulin like domain containing receptor 2                 | -2.345924597 | 0.005777283 |
| <i>SCN2A</i>      | sodium voltage-gated channel alpha subunit 2                     | -2.351689839 | 0.01612589  |
| <i>IL32</i>       | interleukin 32                                                   | -2.356595964 | 0.00101918  |
| <i>HSD11B1</i>    | hydroxysteroid 11-beta dehydrogenase 1                           | -2.362218595 | 0.000616679 |
| <i>NPAS1</i>      | neuronal PAS domain protein 1                                    | -2.38509115  | 2.14913E-09 |
| <i>CELF4</i>      | CUGBP Elav-like family member 4                                  | -2.397723746 | 0.01864044  |

|                   |                                                         |              |             |
|-------------------|---------------------------------------------------------|--------------|-------------|
| <i>SDK2</i>       | sidekick cell adhesion molecule 2                       | -2.414618146 | 5.00587E-30 |
| <i>FAM43B</i>     | family with sequence similarity 43 member B             | -2.417441818 | 0.005734886 |
| <i>RELN</i>       | reelin                                                  | -2.443817102 | 0.003483523 |
| <i>BTBD8</i>      | BTB domain containing 8                                 | -2.475392377 | 0.000984211 |
| <i>LONRF2</i>     | LON peptidase N-terminal domain and ring finger 2       | -2.478477798 | 2.16136E-11 |
| <i>SCN7A</i>      | sodium voltage-gated channel alpha subunit 7            | -2.482115699 | 0.005655595 |
| <i>ADAP1</i>      | ArfGAP with dual PH domains 1                           | -2.490141884 | 0.000516603 |
| <i>AIRE</i>       | autoimmune regulator                                    | -2.495767873 | 1.89836E-06 |
| <i>DPYSL5</i>     | dihydropyrimidinase like 5                              | -2.509677934 | 1.68175E-15 |
| <i>NHLH2</i>      | nescient helix-loop-helix 2                             | -2.515217017 | 9.32663E-30 |
| <i>GNAT1</i>      | G protein subunit alpha transducin 1                    | -2.526506819 | 0.029138282 |
| <i>UGT2B4</i>     | UDP glucuronosyltransferase family 2 member B4          | -2.571625403 | 3.85685E-06 |
| <i>TMEM178B</i>   | transmembrane protein 178B                              | -2.59172763  | 1.17119E-59 |
| <i>GJA5</i>       | gap junction protein alpha 5                            | -2.609205441 | 1.64855E-08 |
| <i>AFF3</i>       | ALF transcription elongation factor 3                   | -2.652820225 | 0.047420947 |
| <i>MYH6</i>       | myosin heavy chain 6                                    | -2.660505638 | 3.32316E-09 |
| <i>MYH1</i>       | myosin heavy chain 1                                    | -2.667226287 | 4.28409E-13 |
| <i>INA</i>        | internexin neuronal intermediate filament protein alpha | -2.668632236 | 0.010260118 |
| <i>NKAIN4</i>     | sodium/potassium transporting ATPase interacting 4      | -2.683826755 | 0.034810829 |
| <i>DCX</i>        | doublecortin                                            | -2.709482013 | 3.53112E-08 |
| <i>DIRAS2</i>     | DIRAS family GTPase 2                                   | -2.731609283 | 0.0080137   |
| <i>BEGAIN</i>     | brain enriched guanylate kinase associated              | -2.737767166 | 0.037039297 |
| <i>ZNF781</i>     | zinc finger protein 781                                 | -2.750962443 | 0.041433385 |
| <i>SCARA5</i>     | scavenger receptor class A member 5                     | -2.768009597 | 4.39118E-10 |
| <i>GALR1</i>      | galanin receptor 1                                      | -2.801132683 | 0.037139691 |
| <i>PDK4</i>       | pyruvate dehydrogenase kinase 4                         | -2.831019397 | 0.00051737  |
| <i>PDZD2</i>      | PDZ domain containing 2                                 | -2.850566244 | 0.010004297 |
| <i>NGFR</i>       | nerve growth factor receptor                            | -2.879977093 | 3.16514E-13 |
| <i>NRARP</i>      | NOTCH regulated ankyrin repeat protein                  | -2.967003151 | 0.034104813 |
| <i>RPTN</i>       | repetin                                                 | -2.975318581 | 0.00362023  |
| <i>AC010422.3</i> | AC010422.3 readthrough                                  | -3.034696001 | 0.033209818 |
| <i>ARC</i>        | activity regulated cytoskeleton associated protein      | -3.043765555 | 0.001840919 |
| <i>GDF6</i>       | growth differentiation factor 6                         | -3.04822861  | 9.08586E-15 |
| <i>SAMD15</i>     | sterile alpha motif domain containing 15                | -3.05838817  | 0.023021402 |
| <i>C12orf42</i>   | chromosome 12 open reading frame 42                     | -3.098787019 | 0.005038486 |
| <i>TBC1D30</i>    | TBC1 domain family member 30                            | -3.116741964 | 1.85836E-06 |

|                  |                                                      |              |             |
|------------------|------------------------------------------------------|--------------|-------------|
| <i>CIQL4</i>     | complement C1q like 4                                | -3.122095899 | 0.005801968 |
| <i>RYR3</i>      | ryanodine receptor 3                                 | -3.152862339 | 6.23527E-06 |
| <i>CACNA1E</i>   | calcium voltage-gated channel subunit alpha1 E       | -3.154784862 | 0.001024993 |
| <i>KCNQ1</i>     | potassium voltage-gated channel subfamily Q member 1 | -3.172358287 | 1.70395E-07 |
| <i>GSG1</i>      | germ cell associated 1                               | -3.173827976 | 5.15447E-05 |
| <i>ESRP1</i>     | epithelial splicing regulatory protein 1             | -3.184071355 | 0.02214051  |
| <i>GPBAR1</i>    | G protein-coupled bile acid receptor 1               | -3.196218517 | 0.044440742 |
| <i>IGF1</i>      | insulin like growth factor 1                         | -3.212495355 | 0.007945092 |
| <i>FREM2</i>     | FRAS1 related extracellular matrix 2                 | -3.263565817 | 2.07025E-54 |
| <i>LRRIQ1</i>    | leucine rich repeats and IQ motif containing 1       | -3.297080775 | 0.010536406 |
| <i>CD24</i>      | CD24 molecule                                        | -3.306524939 | 1.5196E-09  |
| <i>RASSF2</i>    | Ras association domain family member 2               | -3.341046201 | 3.70519E-06 |
| <i>ZNF730</i>    | zinc finger protein 730                              | -3.355318377 | 0.031543199 |
| <i>PSG11</i>     | pregnancy specific beta-1-glycoprotein 11            | -3.396968389 | 0.022314738 |
| <i>DRP2</i>      | dystrophin related protein 2                         | -3.39969905  | 4.87849E-36 |
| <i>CCDC170</i>   | coiled-coil domain containing 170                    | -3.419722597 | 0.0184137   |
| <i>STMN2</i>     | stathmin 2                                           | -3.438255383 | 7.39406E-11 |
| <i>CUX2</i>      | cut like homeobox 2                                  | -3.474253    | 0.00101918  |
| <i>MYH2</i>      | myosin heavy chain 2                                 | -3.493656227 | 6.68099E-24 |
| <i>CXCL13</i>    | C-X-C motif chemokine ligand 13                      | -3.680230955 | 4.13211E-20 |
| <i>MALL</i>      | mal, T cell differentiation protein like             | -3.684467646 | 1.07442E-08 |
| <i>NTF3</i>      | neurotrophin 3                                       | -3.705363066 | 0.026628825 |
| <i>KPRP</i>      | keratinocyte proline rich protein                    | -3.718420971 | 3.33559E-05 |
| <i>SCN3A</i>     | sodium voltage-gated channel alpha subunit 3         | -3.764869992 | 1.88268E-08 |
| <i>GCNT3</i>     | glucosaminyl (N-acetyl) transferase 3, mucin type    | -3.826071587 | 1.63143E-10 |
| <i>SERPINB2</i>  | serpin family B member 2                             | -3.917210704 | 0.001438626 |
| <i>SERPINB12</i> | serpin family B member 12                            | -3.936814001 | 0.000239984 |
| <i>CSMD1</i>     | CUB and Sushi multiple domains 1                     | -3.94524382  | 1.15316E-09 |
| <i>ADGRD1</i>    | adhesion G protein-coupled receptor D1               | -3.968823097 | 6.57796E-28 |
| <i>ADGRB3</i>    | adhesion G protein-coupled receptor B3               | -3.98337514  | 0.004901084 |
| <i>NLRP10</i>    | NLR family pyrin domain containing 10                | -4.157116629 | 0.005115268 |
| <i>INSC</i>      | INSC spindle orientation adaptor protein             | -4.194969484 | 0.001832198 |
| <i>MAS1</i>      | MAS1 proto-oncogene, G protein-coupled receptor      | -4.374162588 | 6.0226E-22  |
| <i>CHRM2</i>     | cholinergic receptor muscarinic 2                    | -4.403697891 | 0.017115536 |
| <i>MYL10</i>     | myosin light chain 10                                | -4.419396312 | 1.17555E-07 |
| <i>KISS1</i>     | KiSS-1 metastasis suppressor                         | -4.423496137 | 2.69415E-07 |

|                   |                                                       |              |             |
|-------------------|-------------------------------------------------------|--------------|-------------|
| <i>CTXN3</i>      | cortixin 3                                            | -4.507775368 | 2.69496E-35 |
| <i>KCNA10</i>     | potassium voltage-gated channel subfamily A member 10 | -4.584129996 | 1.61719E-05 |
| <i>SAA1</i>       | serum amyloid A1                                      | -4.86295248  | 0.021436073 |
| <i>TM4SF20</i>    | transmembrane 4 L six family member 20                | -5.05040186  | 0.000332029 |
| <i>SLC5A1</i>     | solute carrier family 5 member 1                      | -5.151840374 | 0.004103828 |
| <i>AL049839.2</i> | AL049839.2 readthrough                                | -5.545299993 | 0.040980606 |
| <i>AC018512.1</i> | AC018512.1 readthrough                                | -5.712811369 | 0.003424014 |
| <i>PVALB</i>      | parvalbumin                                           | -6.963866832 | 2.01617E-05 |
| <i>CEMP1</i>      | cementum protein 1                                    | -7.01121302  | 0.034021725 |
| <i>DEFB103B</i>   | defensin beta 103B                                    | -7.244418203 | 3.71178E-07 |

**Supplementary Table 4. Gene Ontology enrichment analysis in Flight versus Ground young, athletic derived myobundle**

| GO term categories | Term                                              | Count | p-value | Genes                                                                                                                                                                                                                                                                                                                                                                                            |
|--------------------|---------------------------------------------------|-------|---------|--------------------------------------------------------------------------------------------------------------------------------------------------------------------------------------------------------------------------------------------------------------------------------------------------------------------------------------------------------------------------------------------------|
| Cellular Component | GO:0016021; integral component of plasma membrane | 51    | 0.0043  | <i>GABRB3, CNTNAP2, CSF3R, STEAP4, MYRFL, SLC6A1, CXCL13, PLB1, GRM1, HS6ST3, SLCO2B1, GNRHR, DGAT2, TMEM178B, TMEM40, SHISA9, ANO2, SLCO4A1, CDHR1, OAS3, B3GNT4, OR7A5, SLC29A4, KCNA10, CTXN3, ABCG4, TOR4A, IGSF3, PCDH10, KCNA2, GCNT1, ADRB2, MCHR1, CUZD1, TGFBR3L, FLRT1, SUS4, TM4SF20, GCNT3, SCN3A, GRIA4, KCNJ4, NGFR, SYT1, OR51E2, ABCA4, MGAT4C, MAS1, ADGRD1, PTPRC, UMODL1.</i> |
|                    | GO:0005886; plasma membrane                       | 48    | 0.014   | <i>GABRB3, STEAP4, CSF3R, PCDH10, ITGB3, PALM3, KCNA2, DIRAS2, ADRB2, SLC6A1, CACNA1E, MCHR1, PLB1, GRM1, RELN, PDZD2, SLCO2B1, FLRT1, INSC, TM4SF20, GNRHR, CLIC2, SCN3A, PCDHA7, GRIA4, KCNJ4, NGFR, SERPINB2, CISH, SYT1, SCARA5, OR51E2, PSG1, SSTR2, ANO2, VIL1, MAS1, ADGRD1, PTPRC, SLCO4A1, OAS3, CDHR1, OR7A5, SLC29A4, CNTN3, KCNA10, RCCD1, ABCG4.</i>                                |
|                    | GO:0016020; membrane                              | 37    | 0.012   | <i>TOR4A, CNTNAP2, STEAP4, IGSF3, KCNA2, GCNT1, DIRAS2, ADRB2, SLC6A1, CUZD1, HS6ST3, SERPINA5, TGFBR3L, RIMS3, DMBT1, SLCO2B1, SUS4, TM4SF20, GNRHR, GCNT3, CLIC2, NGFR, DGAT2, TMEM178B, ABCA4, TMEM40, FOS, ADGRD1, PTPRC, OAS3, CDHR1, OR7A5, KCNA10, CTXN3, CD24, ABCG4, PFKP.</i>                                                                                                          |
|                    | GO:0005576; extracellular region                  | 30    | 0.00012 | <i>TOR4A, DEFB103B, CXCL6, CSF3, ITIH3, CSF3R, CXCL8, PSG11, CXCL13, CXCL5, SERPINA5, ESM1, RELN, EFEMP1, PDZD2, C7, DMBT1, ADAMTSL4, SUS4, RPTN, NGFR, SERPINB2, PSG1, VWDE, MMP9, KISS1, MGP, CNTN3, COL6A6, PTX3.</i>                                                                                                                                                                         |
|                    | GO:0005615; extracellular space                   | 28    | 0.00015 | <i>DEFB103B, CXCL6, CSF3, CPB1, CXCL8, GCNT1, CXCL13, CXCL5, SERPINA5, VMO1, TGFBR3L, PODNL1, RELN, EFEMP1, C7, DMBT1, FLRT1, TLE2, SERPINB2, SERPINB7, MMP9, KISS1, CTRL, OAS3, PTX3, FGF12, PNLIPRP3, UMODL1.</i>                                                                                                                                                                              |
|                    | GO:0005887; integral component of plasma membrane | 22    | 0.00043 | <i>GABRB3, NGFR, CSF3R, SCARA5, PCDH10, ITGB3, ABCA4, KCNA2, ADRB2, SSTR2, SLC6A1, MCHR1, GRM1, MAS1, ADGRD1, PTPRC, SLCO4A1, SLCO2B1, CDHR1, FLRT1, GNRHR, PCDHA7.</i>                                                                                                                                                                                                                          |
| Molecular Function | GO:0042802; identical protein binding             | 18    | 0.00095 | <i>GABRB3, SYT1, ITGB3, PRDM6, FOS, ADRB2, SLC6A1, MMP9, CXCL5, VIL1, ADAMTSL4, GIPC2, PTX3, ABCG4, PCDHA7, PVALB, MDFI, PFKP</i>                                                                                                                                                                                                                                                                |
|                    | GO:0005509; calcium ion binding                   | 14    | 0.0011  | <i>SYT1, PCDH10, VWDE, CACNA1E, VIL1, SCIN, EFEMP1, CDHR1, MGP, MYL10, PCDHA7, RPTN, PVALB, UMODL1.</i>                                                                                                                                                                                                                                                                                          |



**Supplementary Table 5. Gene Ontology enrichment analysis in Flight versus Ground old, sedentary derived myobundles**

| GO term categories | Term                                       | Count | p-value  | Genes                                                                                                                                                                                                                                                                                                                                                                                                                                                                                                                                                                                                                                                                                                         |
|--------------------|--------------------------------------------|-------|----------|---------------------------------------------------------------------------------------------------------------------------------------------------------------------------------------------------------------------------------------------------------------------------------------------------------------------------------------------------------------------------------------------------------------------------------------------------------------------------------------------------------------------------------------------------------------------------------------------------------------------------------------------------------------------------------------------------------------|
| Cellular Component | GO:0005886; plasma membrane                | 93    | 7.86E-07 | <i>CHRM2, CPM, IFITM1, CSF3R, GAL3ST1, SERPINE1, DIRAS2, SLC6A1, GLDN, GRM1, CDH8, RYR3, RASSF2, GJA5, SLCO2B1, TBC1D30, INSC, GSG1, GNAT1, NOS1, CA14, MINAR1, SERPINB2, ADGRV1, SCARAS, ACTN3, GPBAR1, RTN4RL2, RAB33A, ADRA2A, SLC9A3, ARC, NRN1L, ADGRB3, SLCO4A1, CDHR1, KCNQ1, MALL, PLIN4, AMPH, KCNA10, TRIB3, ADAM8, LCP1, PLCB2, FREM2, ABCG1, CD101, LLGL2, ITGA9, SERPINB12, KCNE5, ABCB4, NOXO1, ADRB2, SLC5A1, RASGRP2, CACNA1E, CORO1A, MCHR1, NKD1, DRP2, NKAIN4, RELN, PDZD2, NPBWR1, GALR1, CDH22, TM4SF20, PIP5K1B, TRPM8, SCN3A, KCNJ3, SLC38A4, SLC14A1, NGFR, MGAM, OR51E2, MX1, HSPA2, ADAP1, VIL1, MAS1, ADGRD1, KRT19, SLC6A9, P2RX1, KCNS3, CNTN3, PCDHB3, SCN2A, SDK2, CDK5R2.</i> |
|                    | GO:0016021; integral component of membrane | 79    | 0.0039   | <i>CHRM2, CNTNAP2, CPM, IFITM1, CSF3R, GAL3ST1, MYRFL, SLC6A1, CXCL13, GLDN, GRM1, CDH8, RYR3, GJA5, SLCO2B1, GSG1, CA14, BRICD5, MINAR1, ADGRV1, TMEM178B, GPBAR1, MID1, SLC9A3, CH25H, MMP13, ADGRB3, SLCO4A1, CDHR1, KCNQ1, PAPP, TMEM217, MALL, UGT2B4, KCNA10, ADAM8, CTXN3, FREM2, ABCG1, CD101, TOR4A, OCA2, COL15A1, NDRG4, KCNE5, ABCB4, ILDR2, ADRB2, SLC5A1, MCHR1, KIAA0040, HSD11B1, HSD11B2, NKAIN4, NPBWR1, GALR1, CDH22, TM4SF20, GCNT3, TRPM8, SCN3A, CSMD1, KCNJ3, SLC38A4, SLC14A1, NGFR, MGAM, LINGO4, SLC37A2, CMTM5, OR51E2, DLK1, MAS1, ADGRD1, P2RX1, KCNS3, PCDHB3, SCN2A, SDK2.</i>                                                                                                 |
|                    | GO:0016020; membrane                       | 63    | 5.95E-04 | <i>CHRM2, CNTNAP2, IFITM1, GAL3ST1, DIRAS2, STMN2, TFCP2L1, SLC6A1, RYR3, SERPINA5, SLCO2B1, GNAT1, CA14, BRICD5, ADGRV1, SLC6A17, TMEM178B, HBA2, CH25H, NRN1L, OAS1, ADGRB3, IRF4, CDHR1, KCNQ1, TMEM217, MALL, KCNA10, CTXN3, ABCG1, CD101, TOR4A, COL15A1, ABCB4, ILDR2, ADRB2, SLC5A1, CORO1A, KIAA0040, BEGAIN, HSD11B1, NPBWR1, GALR1, TM4SF20, GCNT3, CSMD1, IL32, NGFR, MGAM, LINGO4, CMTM5, MX1, SSC5D, HSPA2, DLK1, ADGRD1, SLC6A9, KCNS3, PCDHB3, SCN2A, CD24, PFKP, CDK5R2.</i>                                                                                                                                                                                                                  |
|                    | GO:0005576; extracellular region           | 45    | 0.000031 | <i>TOR4A, DEFB103B, CPM, COL15A1, CSF3R, ECM2, PLGLB1, ELN, SERPINE1, PSG11, CXCL13, CXCL5, SERPINA5, SCUBE2, RELN, EFEMP1, PDZD2, ADAMTSL4, NTF3, PAMR1, RPTN, LGI1, CA11, NGFR, EGFL7, SERPINB2, SPAG6, HBA2, RTN4RL2, IGF1, LYZ, GDF6, MMP9, APLN, MFAP5, CHIT1, KISS1, MMP13, NRN1L, OAS1, PAPP, ADM2, SAA1, MMP19, CNTN3.</i>                                                                                                                                                                                                                                                                                                                                                                            |

|                           |                                                             |           |                 |                                                                                                                                                                                                                                                                                                                            |
|---------------------------|-------------------------------------------------------------|-----------|-----------------|----------------------------------------------------------------------------------------------------------------------------------------------------------------------------------------------------------------------------------------------------------------------------------------------------------------------------|
|                           | <b>GO:0005615;</b><br>extracellular space                   | <b>43</b> | <b>1.61E-05</b> | <i>DEFB103B, CPM, COL15A1, SERPINB12, CPB1, CPXM2, SERPINE1, CXCL13, GLDN, CXCL5, SERPINA5, SCUBE2, RELN, EFEMP1, CHAD, NTF3, BRICD5, IL32, LGI1, LINGO4, EGFL7, SERPINB2, CMTM5, SSC5D, HBA2, RTN4RL2, IGF1, SERPINB7, C1QL4, LYZ, GDF6, MMP9, DLK1, APLN, CHIT1, KISS1, MMP13, KRT18, NRN1L, PAPP, MMP19, LCP1, INA.</i> |
|                           | <b>GO:0005887;</b><br>integral component of plasma membrane | <b>30</b> | <b>0.001</b>    | <i>CHRM2, CSF3R, GAL3ST1, ABCB4, ADRB2, SLC5A1, SLC6A1, MCHR1, GRM1, GJA5, NPBWR1, GALR1, SLCO2B1, TRPM8, SLC38A4, NGFR, SLC14A1, SCARA5, SLC6A17, ADRA2A, MAS1, ADGRD1, SLC6A9, ADGRB3, SLCO4A1, P2RX1, CDHR1, ADAM8, PCDHB3, SCN2A.</i>                                                                                  |
|                           | <b>GO:0009986;</b><br>cell surface                          | <b>16</b> | <b>0.0052</b>   | <i>NGFR, CPM, CNTNAP2, EGFL7, ADGRV1, RTN4RL2, PSG11, HSPA2, SLC6A1, GLDN, SCUBE2, MAS1, SLC9A3, KCNQ1, ADAM8, CD24.</i>                                                                                                                                                                                                   |
| <b>Molecular Function</b> | <b>GO:0005509;</b><br>calcium ion binding                   | <b>25</b> | <b>7.63E-06</b> | <i>RASGRP2, CACNA1E, NCALD, NKD1, CDH8, RYR3, SCUBE2, CAPN9, EFEMP1, CDH22, MYL10, PAMR1, RPTN, EGFL7, ADGRV1, ACTN3, DLK1, VIL1, MMP13, CDHR1, ADAM8, PCDHB3, LCP1, PLCB2, PVALB</i>                                                                                                                                      |
| <b>Biological Process</b> | <b>GO:0007165;</b><br>signal transduction                   | <b>23</b> | <b>0.032</b>    | <i>IL32, GUCY1A2, NDRG4, COL15A1, CSF3R, CMTM5, DIRAS2, MX1, IGF1, RASGRP2, ARHGAP36, PLCXD2, CXCL5, GLDN, APLN, SCUBE2, FAM83E, RASSF2, PPP1R1A, DPYSL5, P2RX1, NTF3, GNAT1.</i>                                                                                                                                          |
|                           | <b>GO:0007155;</b><br>cell adhesion                         | <b>14</b> | <b>0.0115</b>   | <i>IL32, CNTNAP2, COL15A1, EGFL7, CSF3R, CDH8, RELN, PDZD2, CDHR1, CNTN3, PCDHB3, CD24, FREM2, ITGA9.</i>                                                                                                                                                                                                                  |

**Supplementary Table 6. Differentially expressed genes in Ground old, sedentary vs Ground young, athletic derived myobundles**

| Gene                          | Description                                                      | Fold Change | FDR      |
|-------------------------------|------------------------------------------------------------------|-------------|----------|
| <b>Upregulated Genes (31)</b> |                                                                  |             |          |
| ADH1B                         | All-trans-retinol dehydrogenase [NAD (+)]                        | 5.50663     | 0.010542 |
| AC093525.2                    | AC093525.2 readthrough                                           | 5.459093    | 0.009363 |
| GRIA4                         | Glutamate receptor 4                                             | 5.317638    | 0.000103 |
| SORCS1                        | VPS10 domain-containing receptor SorCS1                          | 4.751788    | 5.84E-09 |
| PGA4                          | Pepsin A-4                                                       | 4.188893    | 5.66E-13 |
| PGA3                          | Pepsin A-3                                                       | 3.980967    | 8.90E-05 |
| CD163                         | Scavenger receptor cysteine-rich type 1 protein M130             | 3.590494    | 0.001014 |
| PGA5                          | Pepsin A-5                                                       | 3.278504    | 1.29E-07 |
| PCDHA10                       | Protocadherin alpha-10                                           | 3.194691    | 0.000562 |
| CNTNAP3                       | Contactin-associated protein-like 3                              | 2.952285    | 0.005689 |
| PNLIPRP3                      | Pancreatic lipase-related protein 3                              | 2.752608    | 0.002605 |
| RASSF2                        | Ras association domain-containing protein 2                      | 2.583977    | 0.001096 |
| SEMA3E                        | Semaphorin-3E                                                    | 2.503173    | 5.48E-05 |
| EDIL3                         | EGF-like repeat and discoidin I-like domain-containing protein 3 | 2.478723    | 1.10E-19 |
| SCUBE3                        | Signal peptide, CUB and EGF-like domain-containing protein 3     | 2.462808    | 0.040758 |
| IFI44L                        | Interferon-induced protein 44-like                               | 2.35222     | 0.000728 |
| KCNJ4                         | Inward rectifier potassium channel 4                             | 2.348139    | 0.002507 |
| DOK6                          | Docking protein 6                                                | 2.323972    | 5.45E-05 |
| GPRIN3                        | G protein-regulated inducer of neurite outgrowth 3               | 2.31117     | 0.013039 |
| SNCA                          | Alpha-synuclein                                                  | 2.306055    | 0.041873 |
| BCHE                          | Cholinesterase                                                   | 2.300941    | 0.01719  |
| SCAMP5                        | Secretory carrier-associated membrane protein 5                  | 2.270838    | 3.94E-13 |
| CADM3                         | Cell adhesion molecule 3                                         | 2.23186     | 0.000649 |
| MYMX                          | Protein myomixer                                                 | 2.131104    | 0.002002 |
| FAIM2                         | Protein lifeguard 2                                              | 2.122362    | 0.002104 |

|                                 |                                                      |          |          |
|---------------------------------|------------------------------------------------------|----------|----------|
| GRIK2                           | Glutamate receptor ionotropic                        | 2.122041 | 1.94E-15 |
| ADORA2B                         | Adenosine receptor A2b                               | 2.121165 | 2.30E-10 |
| FAM155A                         | Transmembrane protein FAM155A                        | 2.095744 | 0.000611 |
| EPB41L4A                        | Band 4.1-like protein 4A                             | 2.050197 | 0.033361 |
| CPS1                            | Carbamoyl-phosphate synthase [ammonia], mitochondria | 2.029799 | 4.82E-08 |
| MAGEL2                          | MAGE-like protein 2                                  | 2.013006 | 0.039268 |
| <b>Downregulated Genes (46)</b> |                                                      |          |          |
| AC048338.1                      | AC048338.1 readthrough                               | -9.17064 | 0.000221 |
| BARX1                           | Homeobox protein BarH-like 1                         | -7.57498 | 3.17E-06 |
| CISH                            | Cytokine-inducible SH2-containing protein            | -4.93738 | 0.001598 |
| KIAA0040                        | Uncharacterized protein KIAA0040                     | -4.70838 | 2.70E-10 |
| GAL3ST1                         | Galactosyl ceramide sulfotransferase                 | -4.4283  | 0.002806 |
| SOCS3                           | Suppressor of cytokine signaling 3                   | -4.36672 | 0.000293 |
| ST20-MTHFS                      | ST20-MTHFS readthrough                               | -4.29621 | 0.001366 |
| STEAP4                          | Metalloreductase STEAP4                              | -4.17598 | 0.009271 |
| TAC1                            | Protachykinin-1                                      | -3.57829 | 8.90E-05 |
| ABCC12                          | ATP-binding cassette sub-family C member 12          | -3.42956 | 0.029524 |
| EDN2                            | Endothelin-2                                         | -3.39887 | 0.003263 |
| CH25H                           | Cholesterol 25-hydroxylase                           | -3.38424 | 0.007555 |
| GALNT6                          | Polypeptide N-acetylgalactosaminyltransferase 6      | -3.34097 | 3.33E-05 |
| SMTNL1                          | Smoothelin-like protein 1                            | -3.32285 | 2.64E-05 |
| IL13RA2                         | Interleukin-13 receptor subunit alpha-2              | -3.01697 | 0.001616 |
| NOS2                            | Nitric oxide synthase, inducible                     | -2.93535 | 0.034761 |
| CHRNA9                          | Neuronal acetylcholine receptor subunit alpha-9      | -2.87794 | 0.000649 |
| ALDH1L1                         | Cytosolic 10-formyltetrahydrofolate dehydrogenase    | -2.87196 | 0.018974 |
| ANO1                            | Anoctamin-1                                          | -2.866   | 0.005077 |
| RRAD                            | GTP-binding protein RAD                              | -2.82683 | 0.002793 |
| RORC                            | Nuclear receptor ROR-gamma                           | -2.6904  | 1.46E-16 |
| PDE4B                           | cAMP-specific 3',5'-cyclic phosphodiesterase 4B      | -2.65437 | 0.000553 |
| MB                              | Myoglobin                                            | -2.64115 | 0.000845 |

|             |                                                                  |          |          |
|-------------|------------------------------------------------------------------|----------|----------|
| CALML4      | Calmodulin-like protein 4                                        | -2.59142 | 1.31E-06 |
| SEC14L5     | SEC14-like protein 5                                             | -2.57624 | 0.001385 |
| NNAT        | Neuronatin                                                       | -2.49611 | 1.01E-20 |
| NKX2-3      | Homeobox protein Nkx-2.3                                         | -2.47777 | 0.028421 |
| RPS10-NUDT3 | RPS10-NUDT3 readthrough                                          | -2.43414 | 5.92E-13 |
| KCNRG       | Potassium channel regulatory protein                             | -2.42893 | 0.017351 |
| FAM153A     | Protein FAM153A                                                  | -2.41254 | 0.015294 |
| NGEF        | Ephexin-1                                                        | -2.39547 | 0.002088 |
| SLC9A3      | Sodium/hydrogen exchanger 3                                      | -2.25413 | 0.049253 |
| ZFP36       | mRNA decay activator protein ZFP36                               | -2.25365 | 5.48E-07 |
| RGS16       | Regulator of G-protein signaling 16                              | -2.20432 | 0.03053  |
| GABRE       | Gamma-aminobutyric acid receptor subunit epsilon                 | -2.20095 | 0.000936 |
| PLCB2       | 1-phosphatidylinositol 4,5-bisphosphate phosphodiesterase beta-2 | -2.19351 | 0.003512 |
| CHL1        | ATP-dependent DNA helicase DDX11                                 | -2.16544 | 0.019322 |
| TNXB        | Tenascin-X                                                       | -2.15859 | 0.003185 |
| SLX1A       | Structure-Specific Endonuclease Subunit Homolog A,               | -2.11698 | 0.003213 |
| FOS         | Proto-oncogene c-Fos                                             | -2.11532 | 0.033171 |
| CEBPD       | CCAAT/enhancer-binding protein delta                             | -2.09462 | 9.32E-10 |
| PLIN5       | Perilipin-5                                                      | -2.0714  | 0.001877 |
| GPR83       | Probable G-protein coupled receptor 83                           | -2.0568  | 0.027382 |
| CASQ1       | Calsequestrin-1                                                  | -2.04761 | 0.000667 |
| FOSB        | FBJ murine osteosarcoma viral oncogene homolog B                 | -2.04146 | 0.010059 |
| LLGL2       | LLGL scribble cell polarity complex component 2                  | -2.00584 | 0.000611 |

**Supplementary Table 7. Differentially expressed genes in Flight old, sedentary vs Flight young, athletic derived myobundles**

| Gene                          | Description                                          | Fold Change | FDR         |
|-------------------------------|------------------------------------------------------|-------------|-------------|
| <b>Upregulated Genes (44)</b> |                                                      |             |             |
| ADH1B                         | All-trans-retinol dehydrogenase [NAD(+)] ADH1B       | 6.476466606 | 0.004267711 |
| SULT1A4                       | Sulfotransferase 1A4                                 | 6.46519923  | 0.009108532 |
| PCDHA10                       | Protocadherin alpha-10                               | 5.683026627 | 8.92125E-06 |
| OAS1                          | 2'-5'-oligoadenylate synthase 1                      | 5.15144673  | 0.000673293 |
| SORCS1                        | VPS10 domain-containing receptor SorCS1              | 4.481635518 | 1.21033E-11 |
| CBSL                          | Cystathionine beta-synthase-like protein             | 4.441135365 | 0.018931424 |
| MX1                           | Interferon-induced GTP-binding protein Mx1           | 4.149613978 | 1.13863E-07 |
| CD163                         | Scavenger receptor cysteine-rich type 1 protein M130 | 3.737039114 | 0.002153255 |
| MMP9                          | Matrix metalloproteinase-9                           | 3.734812778 | 0.013499832 |
| TMEM110-MUSTN1                | TMEM110-MUSTN1 readthrough                           | 3.706558203 | 0.000207655 |
| COL28A1                       | Collagen alpha-1(XXVIII) chain                       | 3.701382513 | 0.002712071 |
| SYT1                          | Synaptotagmin-1                                      | 3.689683161 | 0.001941688 |
| PGA3                          | Pepsin A-3                                           | 3.543055223 | 0.000678393 |
| IFI44L                        | Interferon-induced protein 44-like                   | 3.409816459 | 8.1528E-08  |
| OAS3                          | 2'-5'-oligoadenylate synthase 3                      | 3.375568637 | 1.84192E-09 |
| CADM3                         | Cell adhesion molecule 3                             | 3.358524934 | 4.93045E-07 |
| PGA4                          | Pepsin A-4                                           | 3.349734128 | 2.92566E-08 |
| CNTNAP3                       | Contactin-associated protein-like 3                  | 3.330953921 | 0.000212932 |
| ANO2                          | Anoctamin-2                                          | 3.330086633 | 0.015099819 |
| TFCP2L1                       | Transcription factor CP2-like protein 1              | 3.313716199 | 0.016620049 |
| IFI27                         | Interferon alpha-inducible protein 27, mitochondrial | 3.29935305  | 0.011949739 |
| NOV                           | CCN family member 3                                  | 3.293005515 | 0.000473995 |
| IFITM1                        | Interferon-induced transmembrane protein 1           | 3.222678754 | 1.84028E-05 |
| EPSTI1                        | Epithelial-stromal interaction protein 1             | 3.148236733 | 0.008146499 |
| SNCA                          | Alpha-synuclein                                      | 3.08909594  | 0.012642524 |
| SFRP5                         | Secreted frizzled-related protein 5                  | 3.008324388 | 0.012206691 |

|                                 |                                                                  |             |             |
|---------------------------------|------------------------------------------------------------------|-------------|-------------|
| SFRP1                           | Secreted frizzled-related protein 1                              | 2.963010715 | 0.002429386 |
| MYMX                            | Protein myomixer                                                 | 2.841541397 | 9.32065E-06 |
| EPHA3                           | Ephrin type-A receptor 3                                         | 2.770209347 | 0.002479832 |
| GABRB3                          | Gamma-aminobutyric acid receptor subunit beta-3                  | 2.739611434 | 0.000818999 |
| PLA2G4A                         | Cytosolic phospholipase A2                                       | 2.641157626 | 0.005201275 |
| EIF2S3B                         | Eukaryotic translation initiation factor 2 subunit 3B            | 2.465893665 | 0.000828289 |
| FAM9C                           | Family with sequence similarity 9 member C                       | 2.436032937 | 0.001740291 |
| RIMS3                           | Regulating synaptic membrane exocytosis protein 3                | 2.432061242 | 0.001804696 |
| ADORA2B                         | Adenosine receptor A2b                                           | 2.398180367 | 4.22786E-11 |
| PWP2                            | Periodic tryptophan protein 2 homolog                            | 2.36903012  | 0.000155964 |
| TP53TG3D                        |                                                                  | 2.345348958 | 0.042210595 |
| PGA5                            | Pepsin A-5                                                       | 2.330090118 | 0.000579969 |
| FHAD1                           | Forkhead-associated domain-containing protein 1                  | 2.311771577 | 0.031987124 |
| EDIL3                           | EGF-like repeat and discoidin I-like domain-containing protein 3 | 2.305432437 | 1.21792E-15 |
| SLC13A4                         | Solute carrier family 13 member 4                                | 2.045267982 | 0.027502872 |
| IFIH1                           | Interferon-induced helicase C domain-containing protein 1        | 2.028135888 | 0.000847821 |
| SIK1                            | Serine/threonine-protein kinase SIK1                             | 2.018609418 | 8.60471E-16 |
| ACSS3                           | Acyl-CoA synthetase short-chain family member 3, mitochondrial   | 2.010982813 | 3.72392E-07 |
| <b>Downregulated Genes (22)</b> |                                                                  |             |             |
| NNAT                            | Neuronatin                                                       | -2.25377    | 8.6E-16     |
| MAPK4                           | Mitogen-activated protein kinase 4                               | -2.38982    | 9.47E-10    |
| MYH2                            | Myosin heavy chain 2                                             | -2.14487    | 2.2E-08     |
| STAC2                           | SH3 and cysteine-rich domain-containing protein 2                | -2.13934    | 4.74E-08    |
| OSTN                            | Osteocrin                                                        | -2.03364    | 8.09E-08    |
| ACAN                            | Aggrecan core protein                                            | -3.00922    | 1.55E-06    |
| ZNF85                           | Zinc finger protein 85                                           | -2.1116     | 5.89E-05    |
| ARHGEF33                        | Rho guanine nucleotide exchange factor 33                        | -3.03639    | 6.74E-05    |
| ACTN3                           | Alpha-actinin-3                                                  | -2.18816    | 0.000178    |
| BARX1                           | Homeobox protein BarH-like 1                                     | -6.23299    | 0.000242    |

|          |                                                                  |          |          |
|----------|------------------------------------------------------------------|----------|----------|
| TSHZ2    | Teashirt homolog 2                                               | -2.25819 | 0.000374 |
| PDZRN4   | PDZ domain-containing RING finger protein 4                      | -2.34787 | 0.002614 |
| WISP1    | CCN family member 4                                              | -2.91471 | 0.004592 |
| TMEM154  | Transmembrane protein 154                                        | -2.33647 | 0.007467 |
| ZNF781   | Zinc finger protein 781                                          | -3.92229 | 0.008469 |
| ADGRB3   | Adhesion G protein-coupled receptor B3                           | -4.23641 | 0.010137 |
| COMP     | Cartilage oligomeric matrix protein                              | -3.95436 | 0.012927 |
| HIST1H1E | H1.4 linker histone                                              | -3.91815 | 0.013631 |
| TRPV3    | Transient receptor potential cation channel subfamily V member 3 | -2.29342 | 0.021744 |
| GALNT6   | Polypeptide N-acetylgalactosaminyltransferase 6                  | -2.05224 | 0.021867 |
| B3GNT4   | N-acetyllactosaminide beta-1,3-N-acetylglucosaminyltransferase 4 | -2.43406 | 0.027832 |
| ABCC3    | ATP-binding cassette sub-family C member 3                       | -2.00106 | 0.041299 |



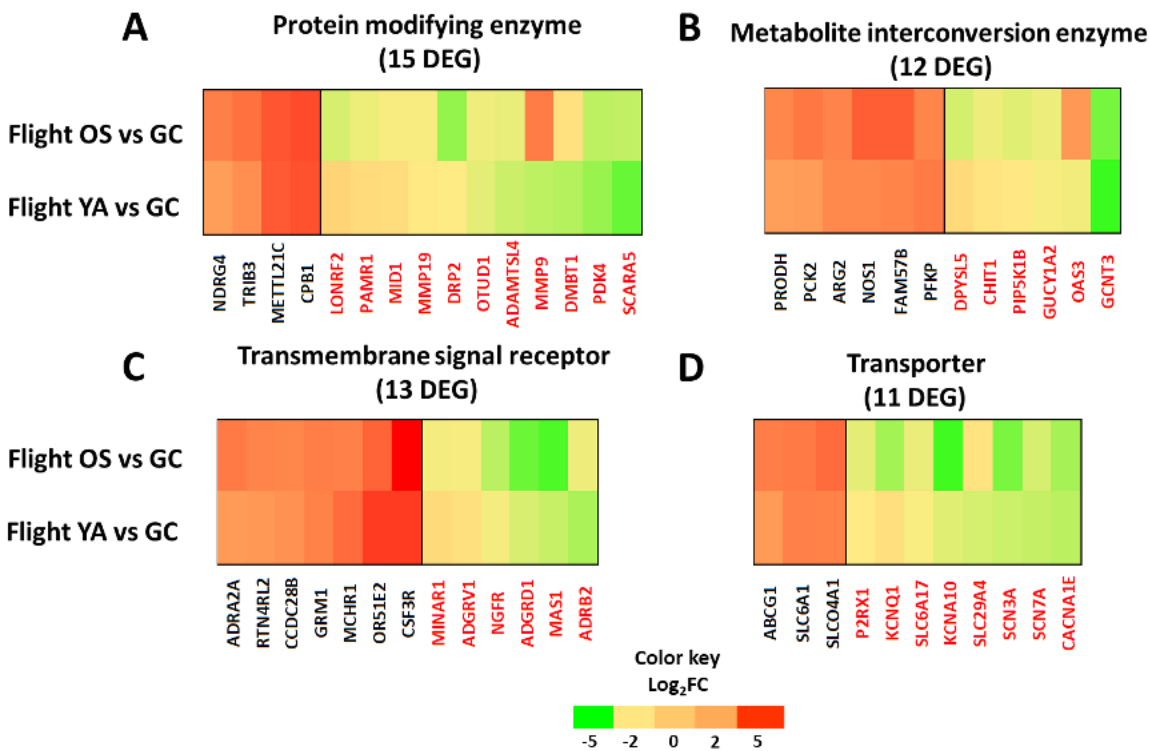

**Supplementary Figure 1. Panther classification system analysis.** Comparative heat map gene expression of the overlapping DEGs among the mean YA and mean OS flight versus ground datasets. DEGs associated with microgravity were normalized to GC and color coded as log<sub>2</sub>FC from -5 to 5, with a p-value  $\leq 0.05$ . The log<sub>2</sub> fold change (log<sub>2</sub>FC) values for the involved genes were extracted and displayed as heatmaps. Each chip is derived from cells pooled from 5 donors of the YA cohort or the OS cohort. Overrepresentation is shown as a significant fold enrichment based on the PANTHER overrepresentation test using Fisher's exact test with FDR multiple correction ( $P \leq 0.05$ ) and *Homo Sapiens* as reference organism. Three chips from each cohort are used in the analysis.

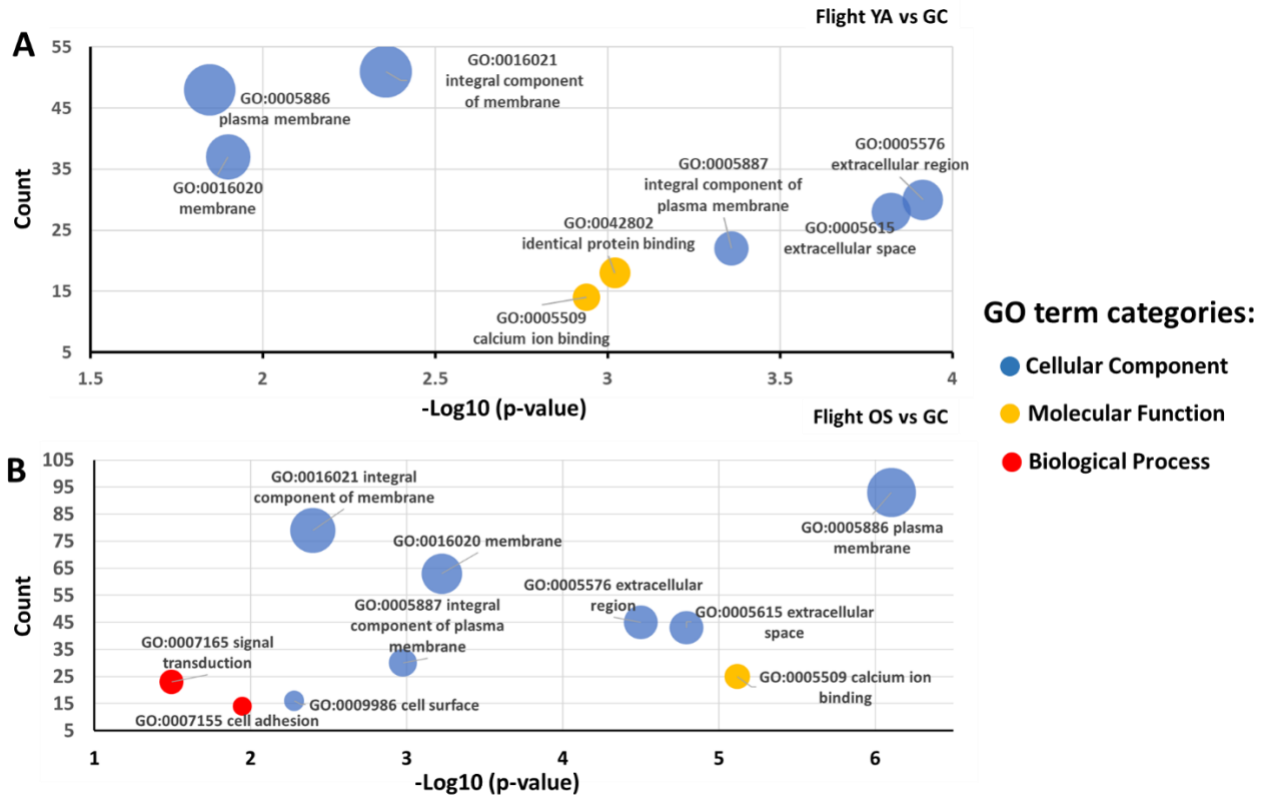

**Supplementary Figure 2. Gene ontology (GO) annotation.** Bubble plots of differentially expressed gene sets overrepresented in the DAVID GO database. The analysis was performed separately for each experimental group. **A.** Flight YA vs. GC and **B.** Flight OS vs. GC. The graphs show only the GO terms above the established cut-off criteria ( $p$ -values  $\leq 0.05$ ,  $|\log_{2}FC| \geq 2$  and  $\geq 14$  genes per group). The x-axis represents the negative logarithm of the adjusted p value [false discovery rate (FDR)] for the GO terms, and the y-axis displays count, so each bubble's size reflects the number of differentially expressed genes, assigned to the GO terms. The top terms in each category, cellular component, molecular function, and biological process, are displayed in blue, orange, and red, respectively. The enriched functional GO terms associated with our gene list are identified and listed according to their enrichment P-value by DAVID using Fisher's Exact p-values test.

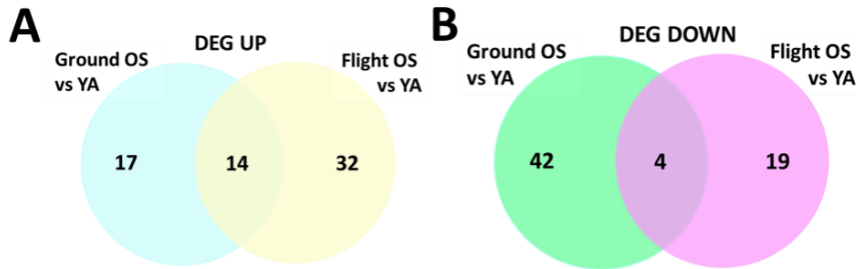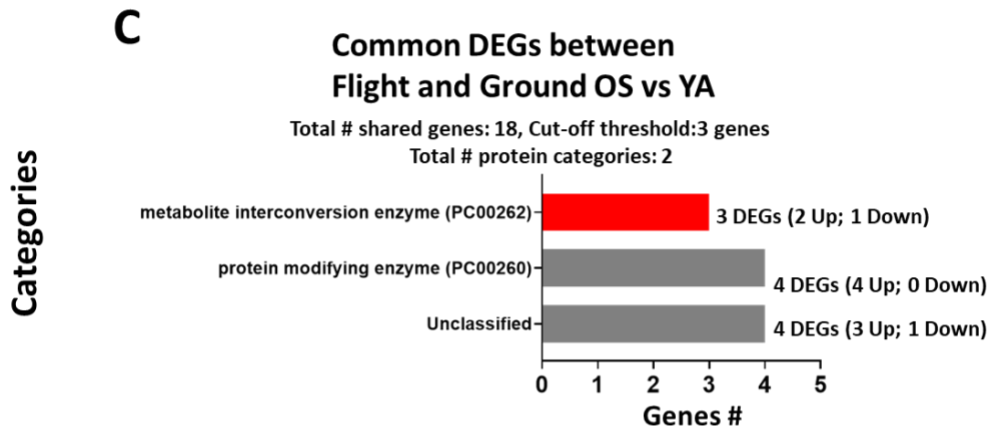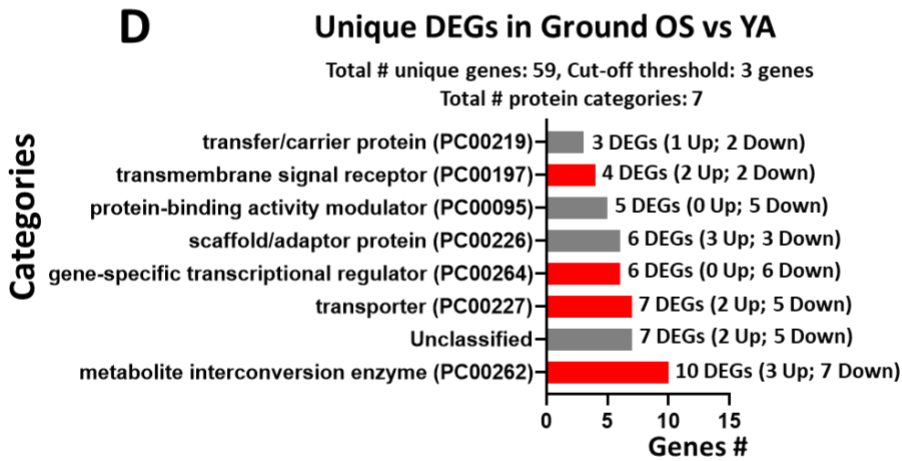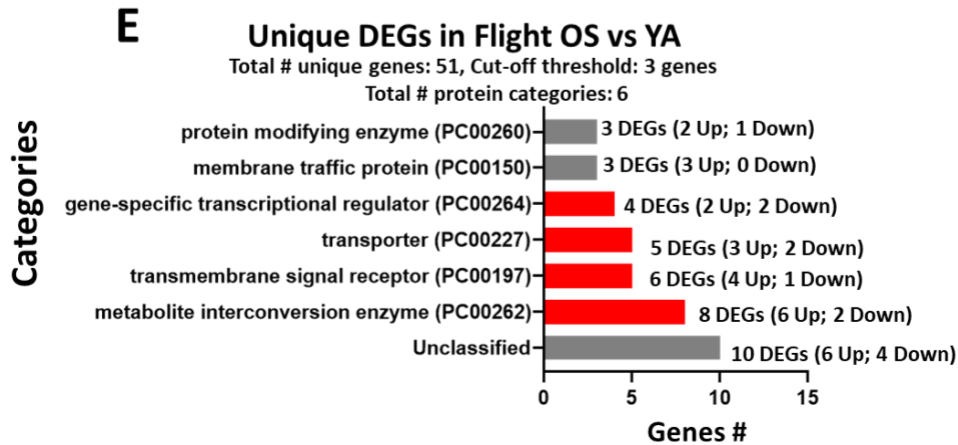

**Supplementary Figure 3. Unique and common DEGs comparing ground OS vs YA and flight OS vs YA datasets.** a. b. Venn diagrams showing the number of up-regulated and down-regulated DEGs identified by RNA-Seq among the two comparisons. DEGs only expressed in the ground comparison (light blue and green circles), only expressed in the flight comparison (yellow and circles), and common to both comparisons (intersections). c. d. e. Classification by Panther classification system of shared and unique DEGs shown in the Venn diagrams. The horizontal bar chart identifies the protein classes (unique gray, shared red) and relative number of DEGs of each functional class by applying a cut-off threshold of 3 genes. The protein categories are entitled with protein classifiers (PC) codes. Overrepresentation is shown as a significant fold enrichment based on the PANTHER overrepresentation test using Fisher's exact test with FDR multiple correction ( $P \leq 0.05$ ) and *Homo Sapiens* as reference organism.
